# Supplementary material
Source: publisher figshare collection journal article supplement (https://acs.figshare.com/ndownloader/files/4706206)
Supplement: Supplementary file 1 [file 4706206]

## Supporting Information

### Combination between Lacunary Polyoxometalates and High-Nuclear Transition Metal Clusters Under Hydrothermal Conditions: III. Structure and Characterization of $[\text{Cu}(\text{enMe})_2]_2\{[\text{Cu}(\text{enMe})_2(\text{H}_2\text{O})]_2[\text{Cu}_6(\text{enMe})_2(\text{B-} \alpha\text{-SiW}_9\text{O}_{34})_2]\}\cdot 4\text{H}_2\text{O}$

Shou-Tian Zheng, Da-Qiang Yuan, Jie Zhang and Guo-Yu Yang\*

<sup>a</sup> State Key Laboratory of Structural Chemistry, Fujian Institute of Research on the Structure of Matter, Chinese Academy of Sciences, Fuzhou, Fujian 350002, China; <sup>b</sup> State Key Laboratory of Coordination Chemistry, Nanjing University, Nanjing, Jiangsu 210093, China

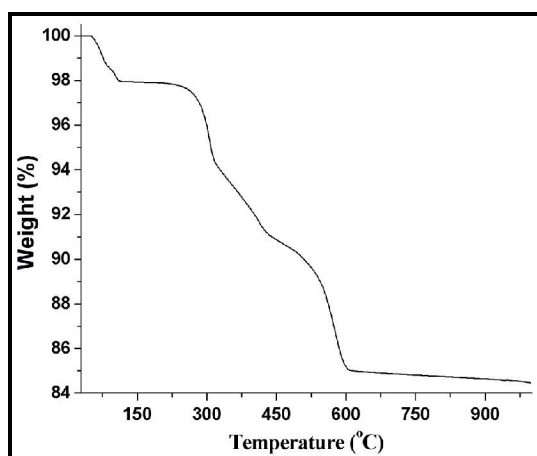

Figure S1. TGA curve of **1**

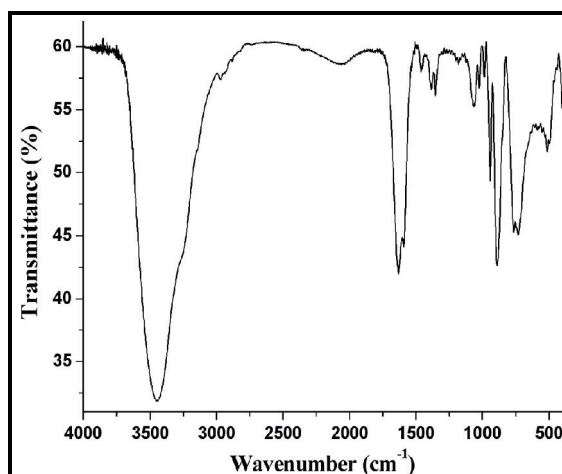

Figure S2. IR spectrum of **1**.

IR spectrum of **1** exhibits an sharp band at ca. 946 cm<sup>-1</sup>, attributed to the  $\nu(\text{W}=\text{O})$ , and features at ca. 1063 cm<sup>-1</sup> due to  $\nu(\text{Si}-\text{O})$ , bands in the 500-890 cm<sup>-1</sup> region are characteristics of  $\nu(\text{M}-\text{O}-\text{M})$  ( $\text{M} = \text{W}$  or  $\text{Cu}$ ). The characteristics of the  $\text{NH}_2$  and  $\text{CH}_2$  groups are fallen in the 1100-1590 cm<sup>-1</sup> region.
